# Supplementary material for: The Effects of High CO2 and Strigolactones on Shoot Branching and Aphid–Plant Compatibility Control in Pea
Source: MDPI journal article supplement (doi:10.3390/ijms232012160), 2022-10-12
Supplement: s1 [file s1]

## Supplementary Figures

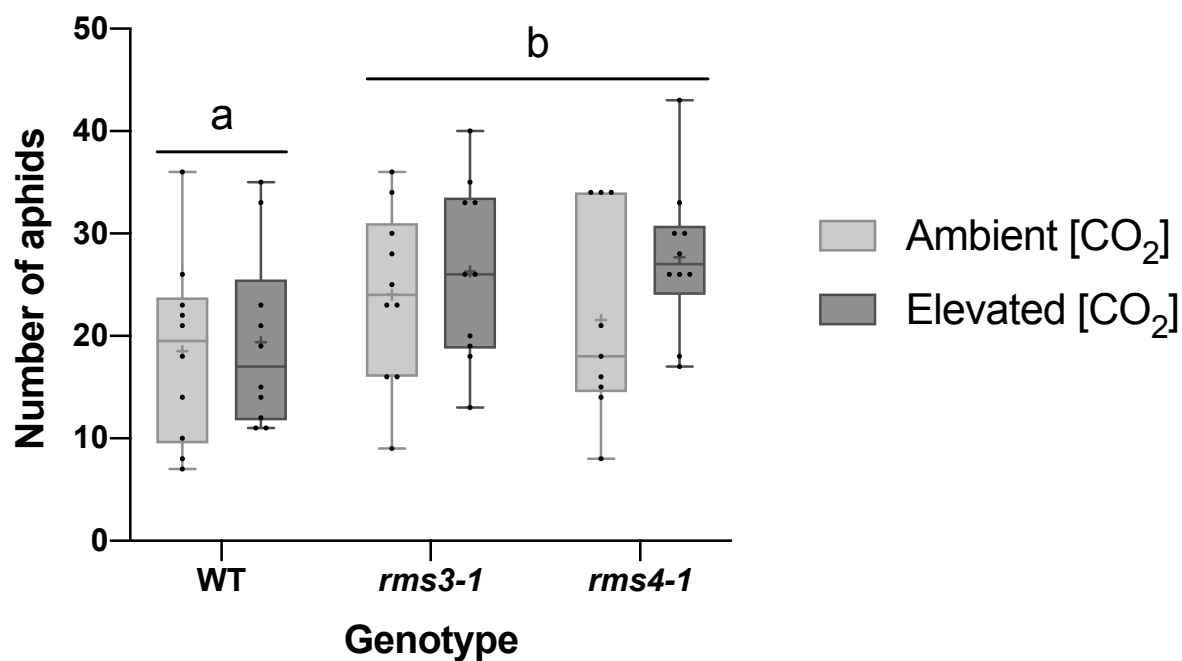

**Figure S1:** The effect of high CO<sub>2</sub> on aphid fecundity on wild type peas and mutants defective in strigolactone (SL) signalling (*rms3-1* and *rms4-1*). A single pea aphid nymph was placed on each 5-day old plant. Plants were then grown in air or under high [CO<sub>2</sub>]. Aphid numbers per plant were determined 15 days later. Ten replicates were performed for each SL mutant and wild type under each [CO<sub>2</sub>]. Different letters indicate a statistically significant difference ( $p \leq 0.05$ ) between wild type and strigolactone mutants (grouped).

## Supplementary Tables

Table S1: Evaluation of normality and heteroscedasity using D'Agostino-Pearson omnibus K2 test and Spearman's test, respectively.

| Dataset                                               | D'Agostino-Pearson omnibus K2 test for normality of residuals |                    | Spearman's test for heteroscedasticity |                    | Subsequent statistical test(s)/ transformation performed    |
|-------------------------------------------------------|---------------------------------------------------------------|--------------------|----------------------------------------|--------------------|-------------------------------------------------------------|
|                                                       | P-value                                                       | Passed (P > 0.05)? | P-value (one tailed)                   | Passed (P > 0.05)? |                                                             |
| <b>Plant height</b>                                   |                                                               |                    |                                        |                    |                                                             |
| Day 7                                                 | 0.3523                                                        | Yes                | 0.3844                                 | Yes                | Two-way ANOVA                                               |
| Day 14                                                | 0.0741                                                        | Yes                | 0.1697                                 | Yes                | Two-way ANOVA                                               |
| Day 32                                                | 0.7717                                                        | Yes                | 0.3627                                 | Yes                | Two-way ANOVA                                               |
| <b>Total branching</b>                                |                                                               |                    |                                        |                    |                                                             |
| Day 7                                                 | 0.9927                                                        | Yes                | 0.0530                                 | Yes                | Two-way ANOVA                                               |
| Day 14                                                | 0.0035                                                        | No                 | 0.0029                                 | No                 | Log transformation                                          |
| Day 14 log transformed                                | 0.2478                                                        | Yes                | 0.1549                                 | Yes                | Two-way ANOVA                                               |
| Day 32                                                | 0.3399                                                        | Yes                | <0.0001                                | No                 | Welch's t-test (CO <sub>2</sub> ); Welch's ANOVA (genotype) |
| <b>Biomass</b>                                        |                                                               |                    |                                        |                    |                                                             |
| Day 28 dry weight                                     | 0.0054                                                        | No                 | 0.0004                                 | No                 | Mann-Whitney (CO <sub>2</sub> ); Kruskal-Wallis (genotype)  |
| Day 28 fresh weight                                   | 0.0023                                                        | No                 | 0.0225                                 | No                 | Mann-Whitney (CO <sub>2</sub> ); Kruskal-Wallis (genotype)  |
| Day 28 plant water content                            | 0.0995                                                        | Yes                | 0.3292                                 | Yes                | Two-way ANOVA                                               |
| Day 32 dry weight                                     | 0.1875                                                        | Yes                | 0.0324                                 | No                 | Welch's t-test (CO <sub>2</sub> ); Welch's ANOVA (genotype) |
| <b>Aphid fecundity</b>                                |                                                               |                    |                                        |                    |                                                             |
| Day 15; aCO <sub>2</sub> (Fig. 5)                     | 0.1956                                                        | Yes                | 0.3148                                 | Yes                | Unpaired t-test                                             |
| Day 15; aCO <sub>2</sub> & eCO <sub>2</sub> (Fig. S1) | 0.1290                                                        | Yes                | 0.1973                                 | Yes                | Unpaired t-test                                             |
| <b>[Phytohormone]</b>                                 |                                                               |                    |                                        |                    |                                                             |
| ACC                                                   | 0.3816                                                        | Yes                | <0.0001                                | No                 | Welch's t-test (Aphid exposure); Welch's ANOVA (genotype)   |
| tZ                                                    | 0.0926                                                        | Yes                | 0.0001                                 | No                 | Welch's t-test (Aphid exposure); Welch's ANOVA (genotype)   |
| iP                                                    | 0.2113                                                        | Yes                | <0.0001                                | No                 | Welch's t-test (Aphid exposure); Welch's ANOVA (genotype)   |
| GA1                                                   | 0.1147                                                        | Yes                | <0.0001                                | No                 | Welch's t-test (Aphid exposure); Welch's ANOVA (genotype)   |
| GA3                                                   | <0.0001                                                       | No                 | 0.0024                                 | No                 | Mann-Whitney (Aphid exposure); Kruskal-Wallis (genotype)    |
| GA4                                                   | 0.9672                                                        | Yes                | 0.0613                                 | Yes                | Two-way ANOVA                                               |
| IAA                                                   | 0.4871                                                        | Yes                | 0.1459                                 | Yes                | Two-way ANOVA                                               |
| ABA                                                   | 0.1708                                                        | Yes                | 0.0100                                 | No                 | Welch's t-test (Aphid exposure); Welch's ANOVA (genotype)   |
| JA                                                    | 0.0404                                                        | No                 | <0.0001                                | No                 | Log transformation                                          |
| JA log transformed                                    | 0.8438                                                        | Yes                | 0.0482                                 | No                 | Welch's t-test (Aphid exposure); Welch's ANOVA (genotype)   |
| SA                                                    | 0.3074                                                        | Yes                | <0.0001                                | No                 | Welch's t-test (Aphid exposure); Welch's ANOVA (genotype)   |
| <b>[Carbohydrate]</b>                                 |                                                               |                    |                                        |                    |                                                             |
| Glucose                                               | 0.9522                                                        | Yes                | 0.0683                                 | Yes                | Two-way ANOVA                                               |
| Fructose                                              | 0.2311                                                        | Yes                | 0.0012                                 | No                 | Welch's t-test (CO <sub>2</sub> ); Welch's ANOVA (genotype) |
| Sucrose                                               | 0.4158                                                        | Yes                | 0.1408                                 | Yes                | Two-way ANOVA                                               |
| Starch                                                | 0.6199                                                        | Yes                | 0.0925                                 | Yes                | Two-way ANOVA                                               |

Table S2: The effect of the independent variables (genotype and [CO<sub>2</sub>] or aphid exposure) on the response measured (dependent variable) were determined. \*, < 0.05; \*\*, < 0.01; \*\*\*, < 0.001; \*\*\*\*, < 0.0001.

| Dependent variable                                             | Test performed          | Source of variation                | % of total variation | P-value | P-value summary | Subsequent statistical test |
|----------------------------------------------------------------|-------------------------|------------------------------------|----------------------|---------|-----------------|-----------------------------|
| <b>Plant height</b>                                            |                         |                                    |                      |         |                 |                             |
| <b>Day 7</b>                                                   |                         |                                    |                      |         |                 |                             |
|                                                                | Two-way ANOVA           | Interaction                        | 38.99                | <0.0001 | ****            |                             |
|                                                                |                         | Genotype                           | 9.853                | 0.0606  | ns              | None                        |
|                                                                |                         | [CO <sub>2</sub> ]                 | 0.2606               | 0.6151  | ns              | None                        |
| <b>Day 14</b>                                                  |                         |                                    |                      |         |                 |                             |
|                                                                | Two-way ANOVA           | Interaction                        | 3.573                | 0.5094  | ns              |                             |
|                                                                |                         | Genotype                           | 40.11                | <0.0001 | ****            | Tukey                       |
|                                                                |                         | [CO <sub>2</sub> ]                 | 2.833                | 0.1099  | ns              | None                        |
| <b>Day 32</b>                                                  |                         |                                    |                      |         |                 |                             |
|                                                                | Two-way ANOVA           | Interaction                        | 0.06934              | 0.9372  | ns              |                             |
|                                                                |                         | Genotype                           | 92.09                | <0.0001 | ****            | Tukey                       |
|                                                                |                         | [CO <sub>2</sub> ]                 | 2.651                | <0.0001 | ****            | Sidak                       |
| <b>Total branching</b>                                         |                         |                                    |                      |         |                 |                             |
| <b>Day 7</b>                                                   |                         |                                    |                      |         |                 |                             |
|                                                                | Two-way ANOVA           | Interaction                        | 3.175                | 0.4953  | ns              |                             |
|                                                                |                         | Genotype                           | 50.51                | <0.0001 | ****            | Tukey                       |
|                                                                |                         | [CO <sub>2</sub> ]                 | 0.08741              | 0.7598  | ns              | None                        |
| <b>Day 14</b>                                                  |                         |                                    |                      |         |                 |                             |
|                                                                | Two-way ANOVA           | Interaction                        | 1.849                | 0.5503  | ns              |                             |
|                                                                |                         | Genotype                           | 67.41                | <0.0001 | ****            | Tukey                       |
|                                                                |                         | [CO <sub>2</sub> ]                 | 0.6997               | 0.2857  | ns              | None                        |
| <b>Day 32</b>                                                  |                         |                                    |                      |         |                 |                             |
|                                                                | Welch's (one-way) ANOVA | Genotype                           | NA                   | <0.0001 | ****            | Dunnett T3                  |
|                                                                | Welch's unpaired t-test | [CO <sub>2</sub> ]                 | NA                   | 0.0044  | **              | Holm-Sidak                  |
| <b>Biomass</b>                                                 |                         |                                    |                      |         |                 |                             |
| <b>Day 28 dry weight</b>                                       |                         |                                    |                      |         |                 |                             |
|                                                                | Kruskal-Wallis          | Genotype                           | NA                   | 0.3347  | ns              | None                        |
|                                                                | Mann-Whitney            | [CO <sub>2</sub> ]                 | NA                   | 0.0111  | *               | Holm-Sidak                  |
| <b>Day 28 fresh weight</b>                                     |                         |                                    |                      |         |                 |                             |
|                                                                | Kruskal-Wallis          | Genotype                           | NA                   | 0.3458  | ns              | None                        |
|                                                                | Mann-Whitney            | [CO <sub>2</sub> ]                 | NA                   | 0.0177  | *               | Holm-Sidak                  |
| <b>Day 28 plant water content</b>                              |                         |                                    |                      |         |                 |                             |
|                                                                | Two-way ANOVA           | Interaction                        | 4.557                | 0.3332  | ns              |                             |
|                                                                |                         | Genotype                           | 51.40                | <0.0001 | ****            | Tukey                       |
|                                                                |                         | [CO <sub>2</sub> ]                 | 10.80                | 0.0019  | **              | Sidak                       |
| <b>Day 32 dry weight</b>                                       |                         |                                    |                      |         |                 |                             |
|                                                                | Welch's (one-way) ANOVA | Genotype                           | NA                   | 0.0225  | *               | Dunnett T3                  |
|                                                                | Welch's unpaired t-test | [CO <sub>2</sub> ]                 | NA                   | 0.0044  | **              | Holm-Sidak                  |
| <b>Aphid fecundity</b>                                         |                         |                                    |                      |         |                 |                             |
| <b>Day 15; aCO<sub>2</sub> (Fig. 5)</b>                        |                         |                                    |                      |         |                 |                             |
|                                                                | Unpaired t-test         | WT vs <i>rms</i> mutants (grouped) | NA                   | 0.0077  | **              | Dunnett T3                  |
| <b>Day 15; aCO<sub>2</sub> &amp; eCO<sub>2</sub> (Fig. S1)</b> |                         |                                    |                      |         |                 |                             |
|                                                                | Unpaired t-test         | WT vs <i>rms</i> mutants (grouped) | NA                   | 0.0226  | *               | Dunnett T3                  |
|                                                                | Unpaired t-test         | [CO <sub>2</sub> ]                 | NA                   | 0.1873  | ns              | None                        |
| <b>[Phytohormone]</b>                                          |                         |                                    |                      |         |                 |                             |
| <b>ACC</b>                                                     |                         |                                    |                      |         |                 |                             |
|                                                                | Welch's (one-way) ANOVA | Genotype                           | NA                   | 0.8047  | ns              | None                        |
|                                                                | Welch's unpaired t-test | Aphid exposure                     | NA                   | <0.0001 | ****            | Multiple unpaired t tests   |
| <b>tZ</b>                                                      |                         |                                    |                      |         |                 |                             |

|                       |                         |                    |        |         |      |                   |
|-----------------------|-------------------------|--------------------|--------|---------|------|-------------------|
|                       | Welch's (one-way) ANOVA | Genotype           | NA     | 0.9809  | ns   | None              |
|                       | Welch's unpaired t-test | Aphid exposure     | NA     | <0.0001 | **** | Holm-Sidak        |
| <b>iP</b>             |                         |                    |        |         |      |                   |
|                       | Welch's (one-way) ANOVA | Genotype           | NA     | 0.8440  | ns   | None              |
|                       | Welch's unpaired t-test | Aphid exposure     | NA     | <0.0001 | **** | Holm-Sidak        |
| <b>GA1</b>            |                         |                    |        |         |      |                   |
|                       | Welch's (one-way) ANOVA | Genotype           | NA     | 0.7351  | ns   | None              |
|                       | Welch's unpaired t-test | Aphid exposure     | NA     | <0.0001 | **** | Holm-Sidak        |
| <b>GA3</b>            |                         |                    |        |         |      |                   |
|                       | Kruskal-Wallis          | Genotype           | NA     | 0.0048  | **   | Dunn              |
|                       | Mann-Whitney            | Aphid exposure     | NA     | 0.8153  | ns   | None              |
| <b>GA4</b>            |                         |                    |        |         |      |                   |
|                       | Two-way ANOVA           | Interaction        | 4.079  | 0.0010  | **   |                   |
|                       |                         | Genotype           | 3.369  | 0.0024  | **   | Sidak             |
|                       |                         | Aphid exposure     | 89.86  | <0.0001 | **** | Sidak             |
| <b>IAA</b>            |                         |                    |        |         |      |                   |
|                       | Two-way ANOVA           | Interaction        | 15.38  | 0.2105  | ns   |                   |
|                       |                         | Genotype           | 4.425  | 0.6208  | ns   | None              |
|                       |                         | Aphid exposure     | 0.1441 | 0.8603  | ns   | None              |
| <b>ABA</b>            |                         |                    |        |         |      |                   |
|                       | Welch's (one-way) ANOVA | Genotype           | NA     | 0.5007  | ns   | None              |
|                       | Welch's unpaired t-test | Aphid exposure     | NA     | 0.9585  | ns   | None              |
| <b>JA</b>             |                         |                    |        |         |      |                   |
|                       | Welch's (one-way) ANOVA | Genotype           | NA     | 0.5554  | ns   | None              |
|                       | Welch's unpaired t-test | Aphid exposure     | NA     | <0.0001 | **** | Holm-Sidak        |
| <b>SA</b>             |                         |                    |        |         |      |                   |
|                       | Welch's (one-way) ANOVA | Genotype           | NA     | 0.0324  | ns   | Dunnett's T3 test |
|                       | Welch's unpaired t-test | Aphid exposure     | NA     | 0.2973  | ns   | None              |
| <b>[Carbohydrate]</b> |                         |                    |        |         |      |                   |
| <b>Glucose</b>        |                         |                    |        |         |      |                   |
|                       | Two-way ANOVA           | Interaction        | 1.923  | 0.9090  | ns   |                   |
|                       |                         | Genotype           | 2.146  | 0.8913  | ns   | None              |
|                       |                         | [CO <sub>2</sub> ] | 56.78  | <0.0001 | **** | Sidak             |
| <b>Fructose</b>       |                         |                    |        |         |      |                   |
|                       | Welch's (one-way) ANOVA | Genotype           | NA     | 0.8688  | ns   | None              |
|                       | Welch's unpaired t-test | [CO <sub>2</sub> ] | NA     | 0.0009  | ***  | Holm-Sidak        |
| <b>Sucrose</b>        |                         |                    |        |         |      |                   |
|                       | Two-way ANOVA           | Interaction        | 1.462  | 0.7397  | ns   |                   |
|                       |                         | Genotype           | 4.355  | 0.2473  | ns   | Tukey             |
|                       |                         | [CO <sub>2</sub> ] | 79.41  | <0.0001 | **** | Sidak             |
| <b>Starch</b>         |                         |                    |        |         |      |                   |
|                       | Two-way ANOVA           | Interaction        | 0.7123 | 0.5559  | ns   |                   |
|                       |                         | Genotype           | 0.8778 | 0.4551  | ns   | None              |
|                       |                         | [CO <sub>2</sub> ] | 93.80  | <0.0001 | **** | Sidak             |

Table S3: Multiple comparison tests to compare **genotype** means. \*, < 0.05; \*\*, < 0.01; \*\*\*, < 0.001; \*\*\*\*, < 0.0001.

| Dependent variable     | Multiple comparison test | Comparison                      | Adjusted P-value | Summary |
|------------------------|--------------------------|---------------------------------|------------------|---------|
| <b>Plant height</b>    |                          |                                 |                  |         |
| <b>Day 14</b>          | Tukey                    |                                 |                  |         |
|                        |                          | WT vs. <i>rms3-1</i>            | 0.0018           | **      |
|                        |                          | WT vs. <i>rms4-1</i>            | <0.0001          | ****    |
|                        |                          | WT vs. <i>rms1-2</i>            | <0.0001          | ****    |
|                        |                          | WT vs. <i>rms5-3</i>            | 0.0011           | **      |
|                        |                          | <i>rms3-1</i> vs. <i>rms4-1</i> | 0.6345           | ns      |
|                        |                          | <i>rms3-1</i> vs. <i>rms1-2</i> | 0.8457           | ns      |
|                        |                          | <i>rms3-1</i> vs. <i>rms5-3</i> | 0.9998           | ns      |
|                        |                          | <i>rms4-1</i> vs. <i>rms1-2</i> | 0.9956           | ns      |
|                        |                          | <i>rms4-1</i> vs. <i>rms5-3</i> | 0.7324           | ns      |
|                        |                          | <i>rms1-2</i> vs. <i>rms5-3</i> | 0.9108           | ns      |
| <b>Day 32</b>          | Tukey                    |                                 |                  |         |
|                        |                          | WT vs. <i>rms3-1</i>            | <0.0001          | ****    |
|                        |                          | WT vs. <i>rms4-1</i>            | <0.0001          | ****    |
|                        |                          | WT vs. <i>rms1-2</i>            | <0.0001          | ****    |
|                        |                          | WT vs. <i>rms5-3</i>            | <0.0001          | ****    |
|                        |                          | <i>rms3-1</i> vs. <i>rms4-1</i> | 0.9981           | ns      |
|                        |                          | <i>rms3-1</i> vs. <i>rms1-2</i> | 0.9500           | ns      |
|                        |                          | <i>rms3-1</i> vs. <i>rms5-3</i> | 0.9932           | ns      |
|                        |                          | <i>rms4-1</i> vs. <i>rms1-2</i> | 0.8422           | ns      |
|                        |                          | <i>rms4-1</i> vs. <i>rms5-3</i> | >0.9999          | ns      |
|                        |                          | <i>rms1-2</i> vs. <i>rms5-3</i> | 0.7809           | ns      |
| <b>Total branching</b> |                          |                                 |                  |         |
| <b>Day 7</b>           | Tukey                    |                                 |                  |         |
|                        |                          | WT vs. <i>rms3-1</i>            | 0.1843           | ns      |
|                        |                          | WT vs. <i>rms4-1</i>            | 0.0002           | ***     |
|                        |                          | WT vs. <i>rms1-2</i>            | 0.1752           | ns      |
|                        |                          | WT vs. <i>rms5-3</i>            | 0.3999           | ns      |
|                        |                          | <i>rms3-1</i> vs. <i>rms4-1</i> | 0.1047           | ns      |
|                        |                          | <i>rms3-1</i> vs. <i>rms1-2</i> | 0.0004           | ***     |
|                        |                          | <i>rms3-1</i> vs. <i>rms5-3</i> | 0.9905           | ns      |
|                        |                          | <i>rms4-1</i> vs. <i>rms1-2</i> | <0.0001          | ****    |
|                        |                          | <i>rms4-1</i> vs. <i>rms5-3</i> | 0.0353           | *       |
|                        |                          | <i>rms1-2</i> vs. <i>rms5-3</i> | 0.0017           | **      |
| <b>Day 14</b>          | Tukey                    |                                 |                  |         |
|                        |                          | WT vs. <i>rms3-1</i>            | <0.0001          | ****    |
|                        |                          | WT vs. <i>rms4-1</i>            | <0.0001          | ****    |
|                        |                          | WT vs. <i>rms1-2</i>            | <0.0001          | ****    |
|                        |                          | WT vs. <i>rms5-3</i>            | <0.0001          | ****    |
|                        |                          | <i>rms3-1</i> vs. <i>rms4-1</i> | 0.0963           | ns      |
|                        |                          | <i>rms3-1</i> vs. <i>rms1-2</i> | 0.9061           | ns      |
|                        |                          | <i>rms3-1</i> vs. <i>rms5-3</i> | 0.0032           | **      |
|                        |                          | <i>rms4-1</i> vs. <i>rms1-2</i> | 0.4573           | ns      |
|                        |                          | <i>rms4-1</i> vs. <i>rms5-3</i> | 0.7064           | ns      |
|                        |                          | <i>rms1-2</i> vs. <i>rms5-3</i> | 0.0368           | *       |
| <b>Day 32</b>          | Dunnett T3               |                                 |                  |         |
|                        |                          | WT vs. <i>rms3-1</i>            | <0.0001          | ****    |
|                        |                          | WT vs. <i>rms4-1</i>            | <0.0001          | ****    |
|                        |                          | WT vs. <i>rms1-2</i>            | <0.0001          | ****    |
|                        |                          | WT vs. <i>rms5-3</i>            | <0.0001          | ****    |
|                        |                          | <i>rms3-1</i> vs. <i>rms4-1</i> | 0.9822           | ns      |
|                        |                          | <i>rms3-1</i> vs. <i>rms1-2</i> | >0.9999          | ns      |
|                        |                          | <i>rms3-1</i> vs. <i>rms5-3</i> | 0.9194           | ns      |

|                                                                |                   |                                 |         |      |
|----------------------------------------------------------------|-------------------|---------------------------------|---------|------|
|                                                                |                   | <i>rms4-1</i> vs. <i>rms1-2</i> | 0.9582  | ns   |
|                                                                |                   | <i>rms4-1</i> vs. <i>rms5-3</i> | >0.9999 | ns   |
|                                                                |                   | <i>rms1-2</i> vs. <i>rms5-3</i> | 0.8856  | ns   |
| <b>Biomass</b>                                                 |                   |                                 |         |      |
| <b>Day 28 plant water content</b>                              | Tukey             |                                 |         |      |
|                                                                |                   | WT vs. <i>rms3-1</i>            | <0.0001 | **** |
|                                                                |                   | WT vs. <i>rms4-1</i>            | <0.0001 | **** |
|                                                                |                   | WT vs. <i>rms1-2</i>            | 0.0003  | ***  |
|                                                                |                   | WT vs. <i>rms5-3</i>            | 0.0014  | **   |
|                                                                |                   | <i>rms3-1</i> vs. <i>rms4-1</i> | 0.9025  | ns   |
|                                                                |                   | <i>rms3-1</i> vs. <i>rms1-2</i> | 0.4055  | ns   |
|                                                                |                   | <i>rms3-1</i> vs. <i>rms5-3</i> | 0.1678  | ns   |
|                                                                |                   | <i>rms4-1</i> vs. <i>rms1-2</i> | 0.8631  | ns   |
|                                                                |                   | <i>rms4-1</i> vs. <i>rms5-3</i> | 0.5566  | ns   |
|                                                                |                   | <i>rms1-2</i> vs. <i>rms5-3</i> | 0.9864  | ns   |
| <b>Day 32 dry weight</b>                                       | Dunnett T3        |                                 |         |      |
|                                                                |                   | WT vs. <i>rms3-1</i>            | >0.9999 | ns   |
|                                                                |                   | WT vs. <i>rms4-1</i>            | 0.3580  | ns   |
|                                                                |                   | WT vs. <i>rms1-2</i>            | 0.6315  | ns   |
|                                                                |                   | WT vs. <i>rms5-3</i>            | >0.9999 | ns   |
|                                                                |                   | <i>rms3-1</i> vs. <i>rms4-1</i> | 0.0762  | ns   |
|                                                                |                   | <i>rms3-1</i> vs. <i>rms1-2</i> | 0.3352  | ns   |
|                                                                |                   | <i>rms3-1</i> vs. <i>rms5-3</i> | >0.9999 | ns   |
|                                                                |                   | <i>rms4-1</i> vs. <i>rms1-2</i> | >0.9999 | ns   |
|                                                                |                   | <i>rms4-1</i> vs. <i>rms5-3</i> | 0.0681  | ns   |
|                                                                |                   | <i>rms1-2</i> vs. <i>rms5-3</i> | 0.3324  | ns   |
| <b>Aphid fecundity</b>                                         |                   |                                 |         |      |
| <b>Day 15; aCO<sub>2</sub> (Fig. 5)</b>                        | Dunnett T3        |                                 |         |      |
|                                                                |                   | WT vs. <i>rms3-1</i>            | 0.0228  | *    |
|                                                                |                   | WT vs. <i>rms4-1</i>            | 0.1173  | ns   |
|                                                                |                   | WT vs. <i>rms2-1</i>            | 0.6800  | ns   |
|                                                                |                   | WT vs. <i>rms5-3</i>            | 0.3022  | ns   |
| <b>Day 15; aCO<sub>2</sub> &amp; eCO<sub>2</sub> (Fig. S1)</b> | Dunnett T3        |                                 |         |      |
|                                                                |                   | WT vs. <i>rms3-1</i>            | 0.0537  | ns   |
|                                                                |                   | WT vs. <i>rms4-1</i>            | 0.0867  | ns   |
| <b>Phytohormone [ ]</b>                                        |                   |                                 |         |      |
| <b>GA3</b>                                                     | Dunn              |                                 |         |      |
|                                                                |                   | WT vs. <i>rms3-1</i>            | 0.0778  | ns   |
|                                                                |                   | WT vs. <i>rms4-1</i>            | 0.0044  | **   |
|                                                                |                   | <i>rms3-1</i> vs. <i>rms4-1</i> | >0.9999 | ns   |
| <b>GA4</b>                                                     | Sidak             |                                 |         |      |
|                                                                |                   | WT vs. <i>rms3-1</i>            | 0.0088  | **   |
|                                                                |                   | WT vs. <i>rms4-1</i>            | 0.0050  | **   |
|                                                                |                   | <i>rms3-1</i> vs. <i>rms4-1</i> | 0.9564  | ns   |
| <b>SA</b>                                                      | Dunnett's T3 test |                                 |         |      |
|                                                                |                   | WT vs. <i>rms3-1</i>            | 0.4020  | ns   |
|                                                                |                   | WT vs. <i>rms4-1</i>            | 0.0479  | *    |
|                                                                |                   | <i>rms3-1</i> vs. <i>rms4-1</i> | 0.3310  | ns   |

Table S4: Multiple comparison tests to compare means between ambient and elevated [CO<sub>2</sub>] within genotype. \*, < 0.05; \*\*, < 0.01; \*\*\*, < 0.001; \*\*\*\*, < 0.0001.

| Dependent variable                | Multiple comparison test | Comparison                                               | Adjusted P-value | Summary |
|-----------------------------------|--------------------------|----------------------------------------------------------|------------------|---------|
| <b>Plant height</b>               |                          |                                                          |                  |         |
| <b>Day 32</b>                     | Sidak                    | Ambient [CO <sub>2</sub> ] - Elevated [CO <sub>2</sub> ] |                  |         |
|                                   |                          | WT                                                       | 0.0202           | *       |
|                                   |                          | <i>rms3-1</i>                                            | 0.0406           | *       |
|                                   |                          | <i>rms4-1</i>                                            | 0.3339           | ns      |
|                                   |                          | <i>rms1-2</i>                                            | 0.0960           | ns      |
|                                   |                          | <i>rms5-3</i>                                            | 0.0781           | ns      |
| <b>Total branching</b>            |                          |                                                          |                  |         |
| <b>Day 32</b>                     | Holm-Sidak               | Ambient [CO <sub>2</sub> ] - Elevated [CO <sub>2</sub> ] |                  |         |
|                                   |                          | WT                                                       | 0.0004           | ***     |
|                                   |                          | <i>rms3-1</i>                                            | 0.0609           | ns      |
|                                   |                          | <i>rms4-1</i>                                            | 0.0601           | ns      |
|                                   |                          | <i>rms1-2</i>                                            | 0.0302           | *       |
|                                   |                          | <i>rms5-3</i>                                            | 0.0779           | ns      |
| <b>Biomass</b>                    |                          |                                                          |                  |         |
| <b>Day 28 dry weight</b>          | Holm-Sidak               | Ambient [CO <sub>2</sub> ] - Elevated [CO <sub>2</sub> ] |                  |         |
|                                   |                          | WT                                                       | 0.4785           | ns      |
|                                   |                          | <i>rms3-1</i>                                            | 0.2069           | ns      |
|                                   |                          | <i>rms4-1</i>                                            | 0.2951           | ns      |
|                                   |                          | <i>rms1-2</i>                                            | 0.6507           | ns      |
|                                   |                          | <i>rms5-3</i>                                            | 0.7369           | ns      |
| <b>Day 28 fresh weight</b>        | Holm-Sidak               | Ambient [CO <sub>2</sub> ] - Elevated [CO <sub>2</sub> ] |                  |         |
|                                   |                          | WT                                                       | 0.7162           | ns      |
|                                   |                          | <i>rms3-1</i>                                            | 0.4887           | ns      |
|                                   |                          | <i>rms4-1</i>                                            | 0.4887           | ns      |
|                                   |                          | <i>rms1-2</i>                                            | 0.7355           | ns      |
|                                   |                          | <i>rms5-3</i>                                            | 0.7355           | ns      |
| <b>Day 28 plant water content</b> | Sidak                    | Ambient [CO <sub>2</sub> ] - Elevated [CO <sub>2</sub> ] |                  |         |
|                                   |                          | WT                                                       | 0.0212           | *       |
|                                   |                          | <i>rms3-1</i>                                            | 0.2230           | ns      |
|                                   |                          | <i>rms4-1</i>                                            | 0.9933           | ns      |
|                                   |                          | <i>rms1-2</i>                                            | 0.9234           | ns      |
|                                   |                          | <i>rms5-3</i>                                            | 0.8572           | ns      |
| <b>Day 32 dry weight</b>          | Holm-Sidak               | Ambient [CO <sub>2</sub> ] - Elevated [CO <sub>2</sub> ] |                  |         |
|                                   |                          | WT                                                       | 0.0031           | **      |
|                                   |                          | <i>rms3-1</i>                                            | 0.0011           | **      |
|                                   |                          | <i>rms4-1</i>                                            | 0.0099           | **      |
|                                   |                          | <i>rms1-2</i>                                            | 0.0098           | **      |
|                                   |                          | <i>rms5-3</i>                                            | 0.0015           | **      |
| <b>Carbohydrate [ ]</b>           |                          |                                                          |                  |         |
| <b>Glucose</b>                    | Sidak                    | Ambient [CO <sub>2</sub> ] - Elevated [CO <sub>2</sub> ] |                  |         |
|                                   |                          | WT                                                       | 0.0804           | ns      |
|                                   |                          | <i>rms3-1</i>                                            | 0.0918           | ns      |
|                                   |                          | <i>rms4-1</i>                                            | 0.0457           | *       |
|                                   |                          | <i>rms1-2</i>                                            | 0.5064           | ns      |
|                                   |                          | <i>rms5-3</i>                                            | 0.1174           | ns      |
| <b>Fructose</b>                   | Holm-Sidak               | Ambient [CO <sub>2</sub> ] - Elevated [CO <sub>2</sub> ] |                  |         |
|                                   |                          | WT                                                       | 0.0376           | *       |
|                                   |                          | <i>rms3-1</i>                                            | 0.0530           | ns      |
|                                   |                          | <i>rms4-1</i>                                            | 0.0026           | **      |
|                                   |                          | <i>rms1-2</i>                                            | 0.0530           | ns      |
|                                   |                          | <i>rms5-3</i>                                            | 0.0075           | **      |
| <b>Sucrose</b>                    | Sidak                    | Ambient [CO <sub>2</sub> ] - Elevated [CO <sub>2</sub> ] |                  |         |

|               |       |                                                          |         |      |
|---------------|-------|----------------------------------------------------------|---------|------|
|               |       | WT                                                       | 0.0004  | ***  |
|               |       | <i>rms3-1</i>                                            | 0.0003  | ***  |
|               |       | <i>rms4-1</i>                                            | 0.0002  | ***  |
|               |       | <i>rms1-2</i>                                            | 0.0016  | **   |
|               |       | <i>rms5-3</i>                                            | 0.0102  | *    |
| <b>Starch</b> | Sidak | Ambient [CO <sub>2</sub> ] - Elevated [CO <sub>2</sub> ] |         |      |
|               |       | WT                                                       | <0.0001 | **** |
|               |       | <i>rms3-1</i>                                            | <0.0001 | **** |
|               |       | <i>rms4-1</i>                                            | <0.0001 | **** |
|               |       | <i>rms1-2</i>                                            | <0.0001 | **** |
|               |       | <i>rms5-3</i>                                            | <0.0001 | **** |



Table S5: Multiple comparison tests to compare means between aphid vs no aphid exposure within genotype. \*, < 0.05; \*\*, < 0.01; \*\*\*, < 0.001; \*\*\*\*, < 0.0001.

| Dependent variable      | Multiple comparison test | Comparison              | Adjusted P-value | Summary |
|-------------------------|--------------------------|-------------------------|------------------|---------|
| <b>Phytohormone [ ]</b> |                          |                         |                  |         |
| <b>ACC</b>              | Holm-Sidak               | Control - Aphid exposed |                  |         |
|                         |                          | WT                      | 0.0154           | *       |
|                         |                          | <i>rms3-1</i>           | 0.0082           | **      |
|                         |                          | <i>rms4-1</i>           | 0.0154           | *       |
| <b>tZ</b>               | Holm-Sidak               | Control - Aphid exposed |                  |         |
|                         |                          | WT                      | 0.0028           | **      |
|                         |                          | <i>rms3-1</i>           | 0.0016           | **      |
|                         |                          | <i>rms4-1</i>           | 0.0028           | **      |
| <b>iP</b>               | Holm-Sidak               | Control - Aphid exposed |                  |         |
|                         |                          | WT                      | 0.0779           | ns      |
|                         |                          | <i>rms3-1</i>           | 0.0452           | *       |
|                         |                          | <i>rms4-1</i>           | 0.0779           | ns      |
| <b>GA1</b>              | Holm-Sidak               | Control - Aphid exposed |                  |         |
|                         |                          | WT                      | 0.0191           | *       |
|                         |                          | <i>rms3-1</i>           | 0.0203           | *       |
|                         |                          | <i>rms4-1</i>           | 0.0332           | *       |
| <b>GA4</b>              | Sidak                    | Control - Aphid exposed |                  |         |
|                         |                          | WT                      | <0.0001          | ****    |
|                         |                          | <i>rms3-1</i>           | <0.0001          | ****    |
|                         |                          | <i>rms4-1</i>           | <0.0001          | ****    |
| <b>JA</b>               | Holm-Sidak               | Control - Aphid exposed |                  |         |
|                         |                          | WT                      | <0.0001          | ****    |
|                         |                          | <i>rms3-1</i>           | 0.0001           | ***     |
|                         |                          | <i>rms4-1</i>           | 0.0006           | ***     |

Table S6: The correlation of aphid numbers to phytohormones in pea on which a single *Acyrtosiphon pisum* nymph was allowed to reproduce for a period of 15 days.

| Hormone | Pearson correlation coefficient ( <i>r</i> ) | p-value (Pearson) | Coefficient of determination ( <i>R</i> <sup>2</sup> ) |
|---------|----------------------------------------------|-------------------|--------------------------------------------------------|
| ACC     | -0.161                                       | 0.395             | 0.026                                                  |
| tZ      | -0.323                                       | 0.081             | 0.105                                                  |
| iP      | 0.103                                        | 0.588             | 0.011                                                  |
| GA1     | 0.014                                        | 0.942             | 0.000                                                  |
| GA3     | <b>-0.429</b>                                | <b>0.018</b>      | <b>0.184</b>                                           |
| IAA     | -0.186                                       | 0.326             | 0.034                                                  |
| ABA     | 0.024                                        | 0.901             | 0.001                                                  |
| JA      | -0.328                                       | 0.077             | 0.107                                                  |
| SA      | 0.061                                        | 0.748             | 0.004                                                  |
| GA4     | 0.245                                        | 0.192             | 0.060                                                  |
